# Supplementary figures and images for: DPM-1001 decreased copper levels and ameliorated deficits in a mouse model of Wilson's disease
Source: PubMed Central journal article supplement — Genes Dev. 2018 Jul 1;32(13-14):944–52. doi: 10.1101/gad.314658.118 (PMC6075031; doi:10.1101/gad.314658.118), 2018-07-01

A.

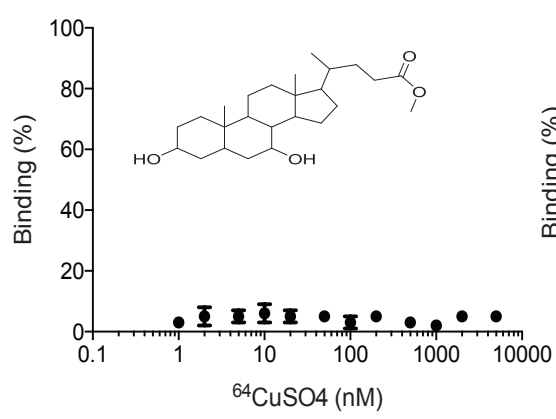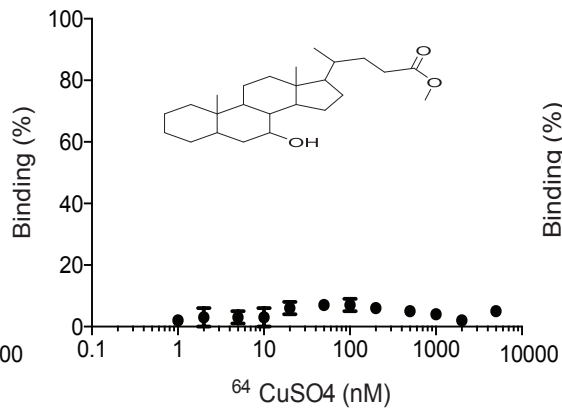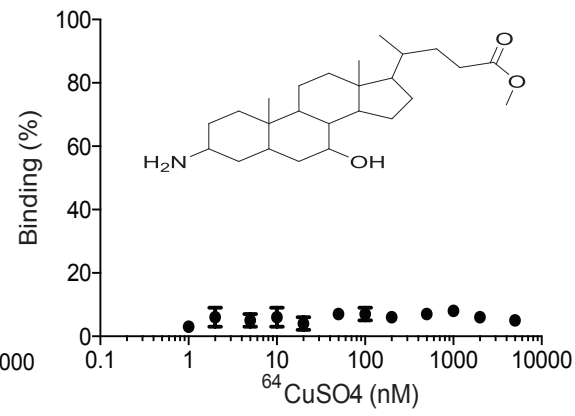

B.

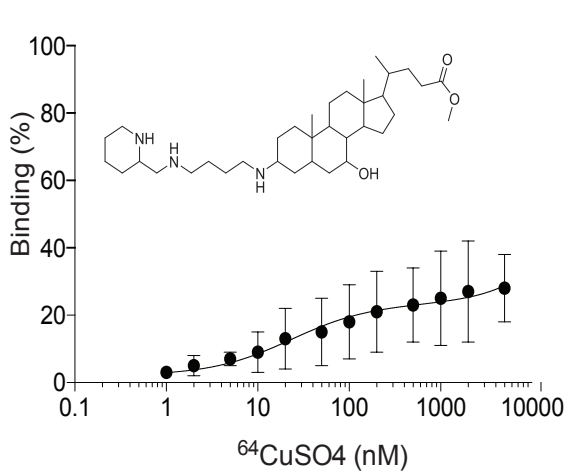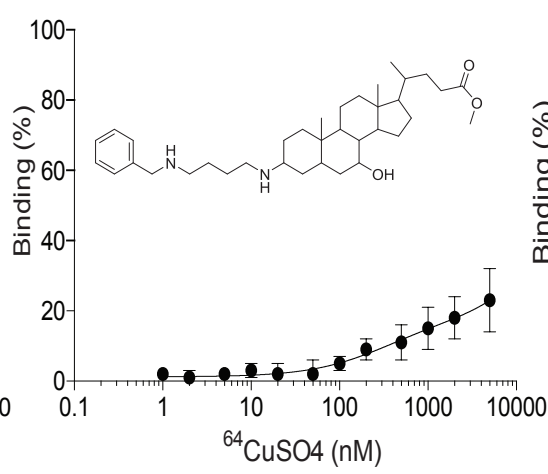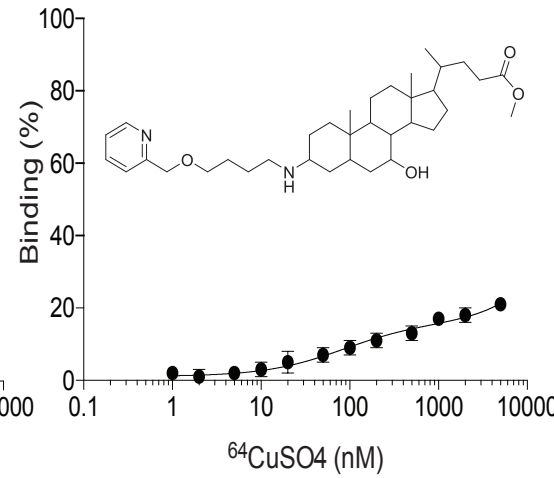

Supplement: supp_gad.314658.118_Supplemental_Figure_1.pdf [file supp_gad.314658.118_Supplemental_Figure_1.pdf]

A.

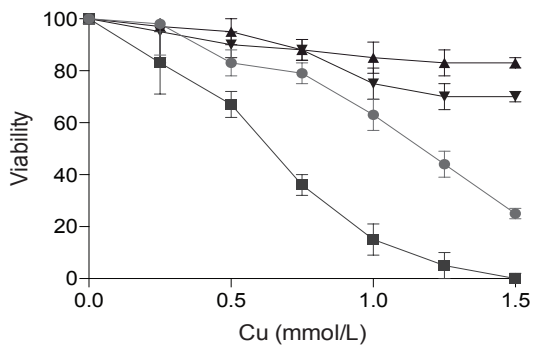

B.

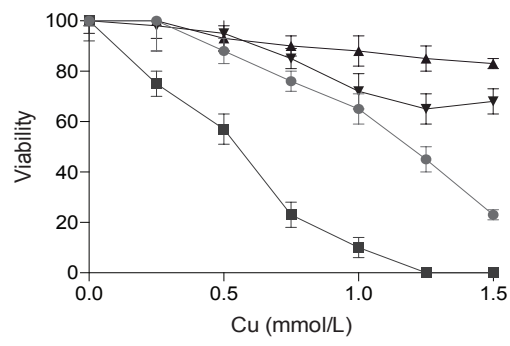

C.

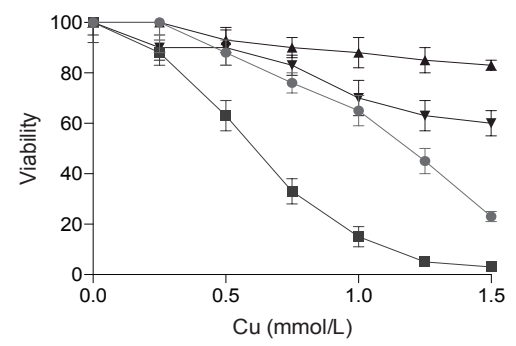

Supplement: supp_gad.314658.118_Supplemental_Figure_2.pdf [file supp_gad.314658.118_Supplemental_Figure_2.pdf]

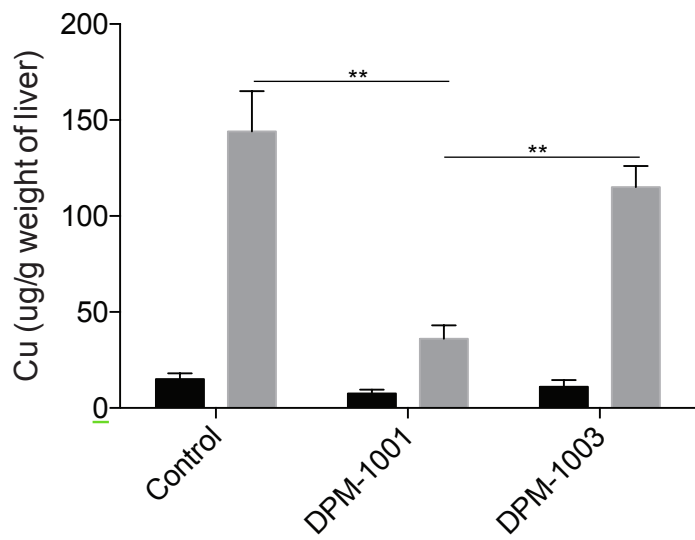

Supplement: supp_gad.314658.118_Supplemental_Figure_3_.pdf [file supp_gad.314658.118_Supplemental_Figure_3_.pdf]
